# Supplementary material
Source: publisher figshare collection journal article supplement (https://karger.figshare.com/ndownloader/files/12280448)
Supplement: Supplementary file 1 [file 12280448]

| **Supplemental Table 2. Location of mutated SNPs and details of polymorphisms** | | | | | | |
| --- | --- | --- | --- | --- | --- | --- |
| Patient | *MICA* |  | *ARID2* |  | *ZFHX3* |  |
| SNP location | Variants | SNP location | Variants | SNP location | details |
| G1 | - | - | - | - | - | - |
| G2 | - | - | rs150136669 | G→? (indeterminate) | - | - |
| G3 | - | - | - | - | - | - |
| G4 | rs147667828 | G→GCTGCTGCTGCT | - | - | not registered site | ACCGCCGCCGCCGCCG  →ACCGCCGCCGCCG |
| G5 | - | - | - | - | - | - |
| G6 | - | - | - | - | - | - |
| P1 | rs147667828 | G→GCT | rs150136669 | G→? (indeterminate) | HA94554 | CTTGTTGTTGTTGTTGTTGTTGTTGTTGTTG →CTTGTTGTTGTTGTTGTTGTTGTTG |
| P2 | - | - | rs150136669 | G→? (indeterminate) | rs4788682 | A→G |
| P3 | rs147667828 | G→GCT | rs150136669 | G→? (indeterminate) | rs2073852 | C→G |
| P4 | rs147667828 | G→GCT | - | - | -- | - |
